# Supplementary material for: Toxicity Assessment of Mixed Exposure of Nine Perfluoroalkyl Substances at Concentrations Relevant to Daily Intake
Source: MDPI journal article supplement (doi:10.3390/toxics12010052), 2024-01-10
Supplement: s1 [file s1]

---

# Supplementary Materials: Toxicity Assessment of Mixed Exposure of Nine Perfluoroalkyl Substances at Concentrations Relevant to Daily Intake

Kazuki Takeda, Taki Saito, Sakura Sasaki, Akifumi Eguchi, Makoto Sugiyama, Kio Suzuki, Saeka Eto, and

Ryo Kamata

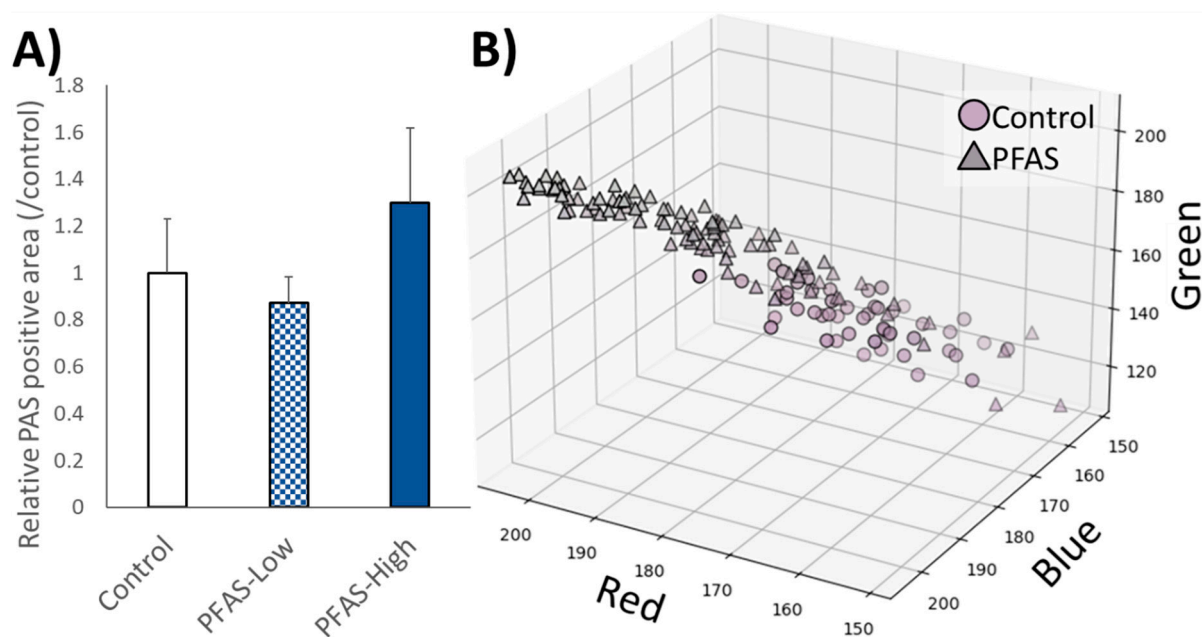

**Figure S1.** A) Area value of PAS stain positive region. The values are shown relative to the mean value of the control group (mean  $\pm$  SD, N=5). No significant differences were detected in all substances (Tukey Kramer's HSD test,  $p > 0.05$ ). B) Colorimetric determination of hepatocyte cytoplasm. RGB values of 50 points were mechanically obtained from cytoplasmic regions in the images of periodate Schiff (PAS) stain with amylase digestion (Fig. 1).

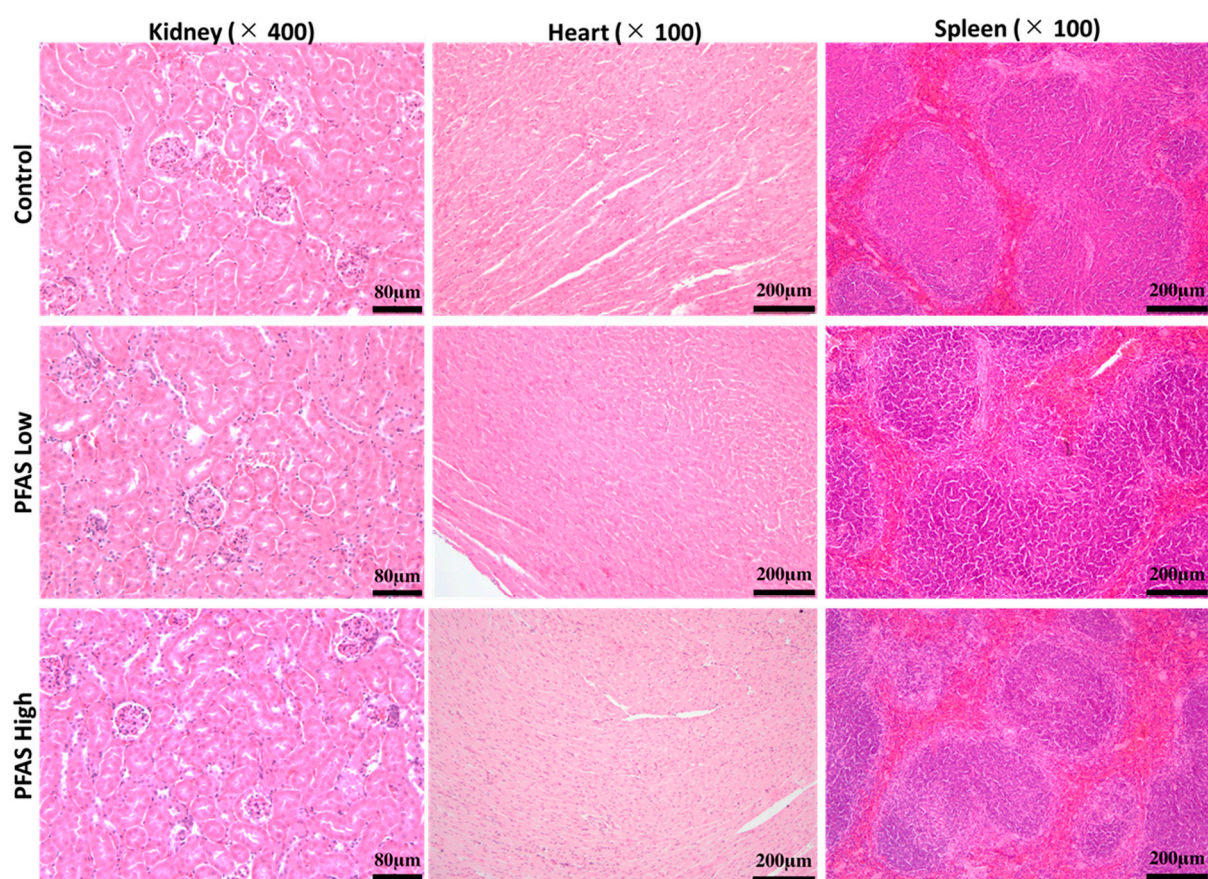

**Figure S2.** Histological examination of the kidney, heart, and spleen by hematoxylin and eosin (HE) staining.

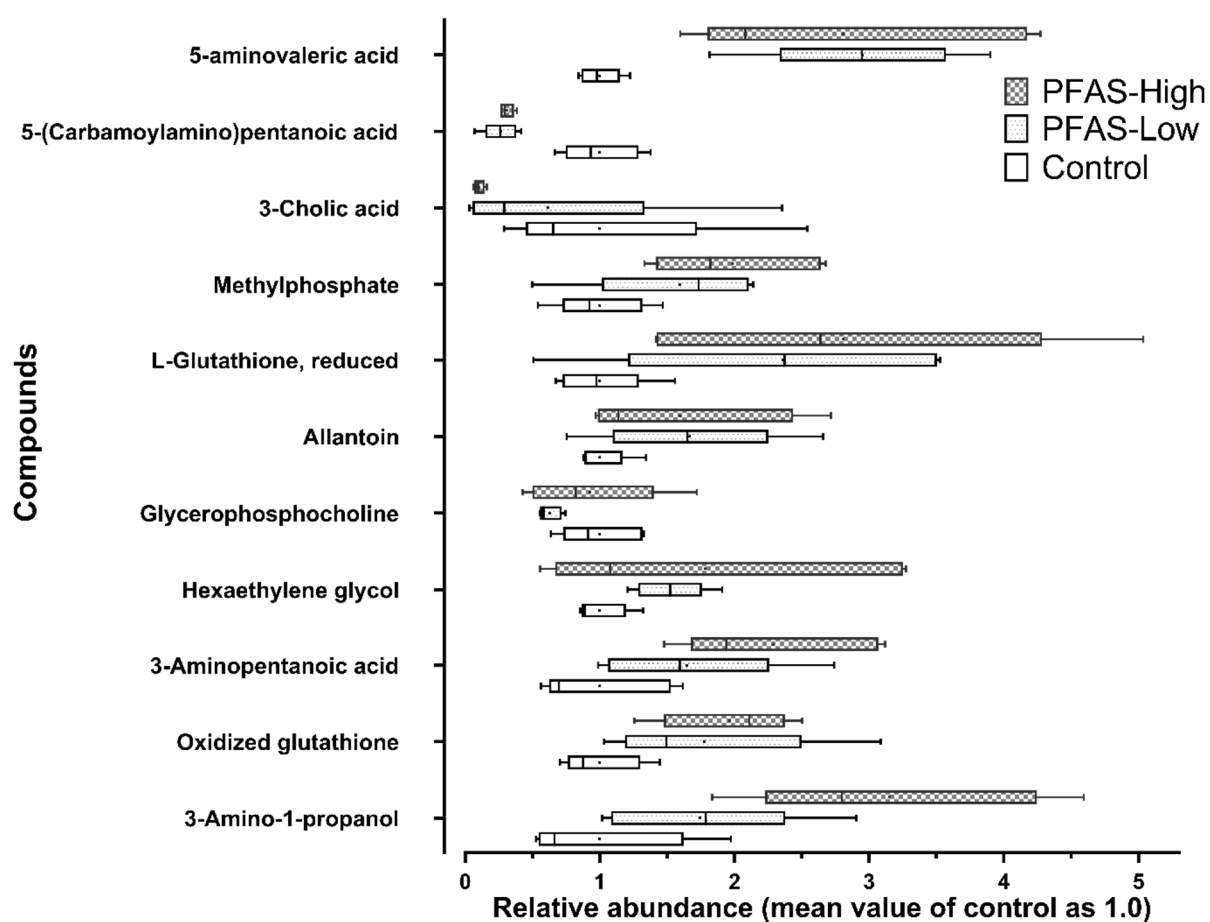

**Figure S3.** Box-and-whisker plot of the top 10 essential compounds in the random forest classifier shown in Fig. 4D. The x-axis represents the relative abundance corrected by dividing it by the control group's mean for each compound (the mean of the control should be 1.0). + indicates mean values. No significant differences were detected in all substances (FDR adjusted  $p > 0.05$ ).

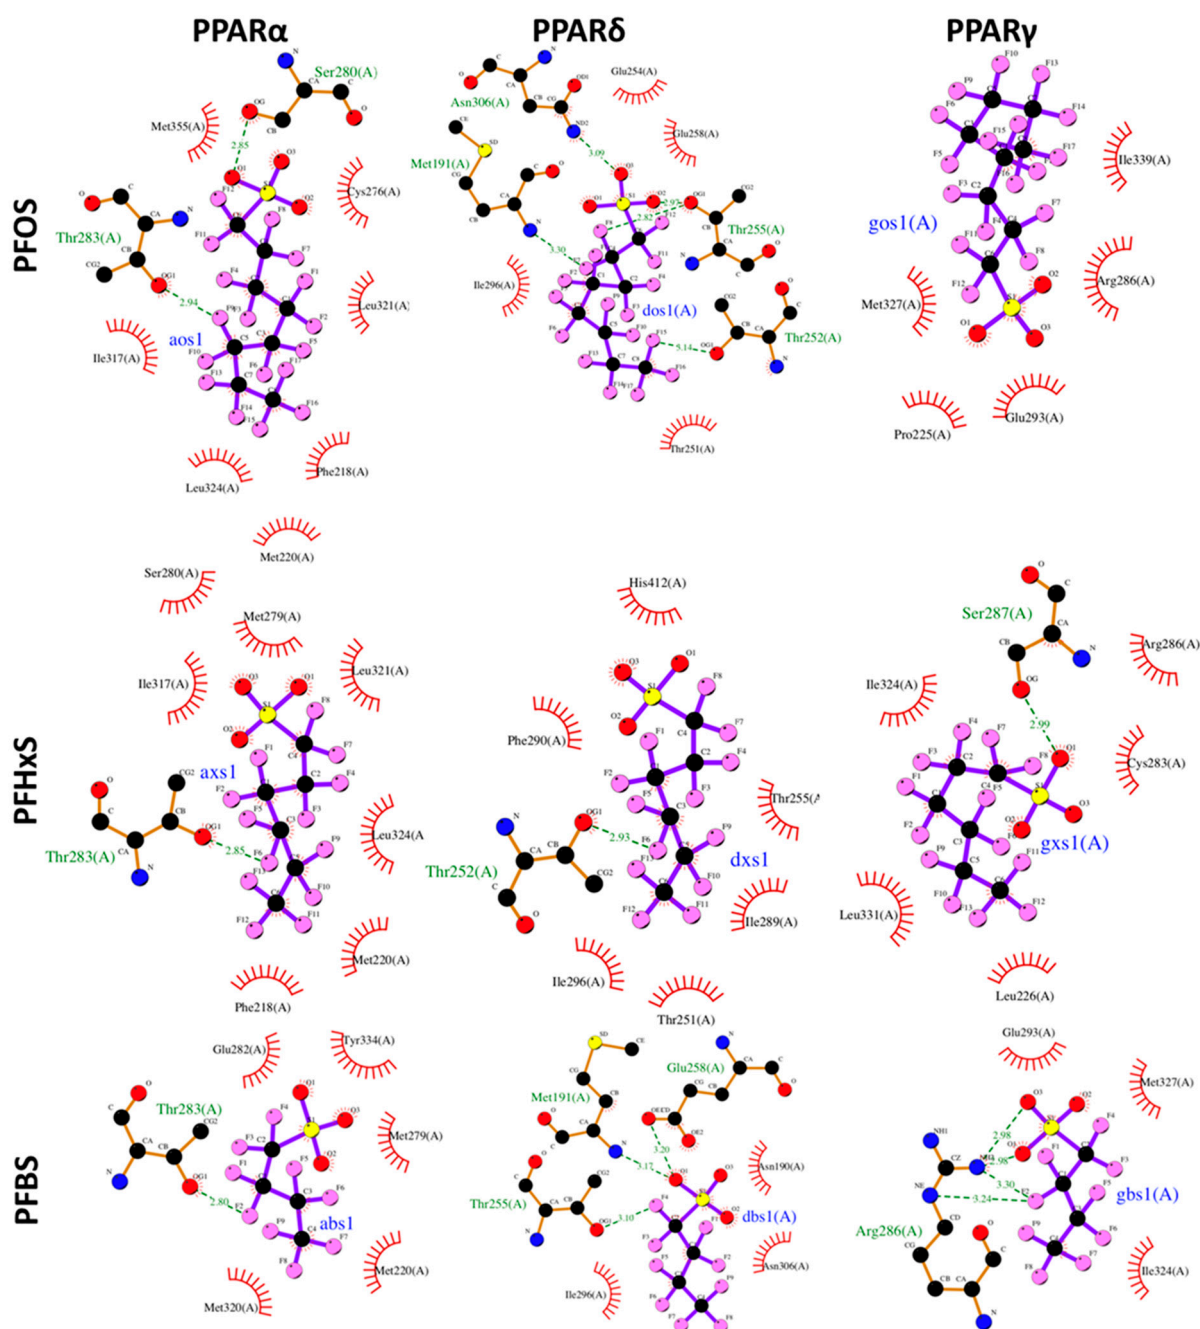

**Figure S4.** Representative 2D diagram of binding poses between peroxisome proliferator-activated receptors ( $\alpha$ ,  $\delta$ , and  $\gamma$ ) and poly-fluoroalkyl substances (PFOS; perfluorooctanesulfonic acid, PFHxS; Perfluorohexanesulfonic acid, and PFBS; perfluorobutanesulfonic acid) obtained by molecular docking.

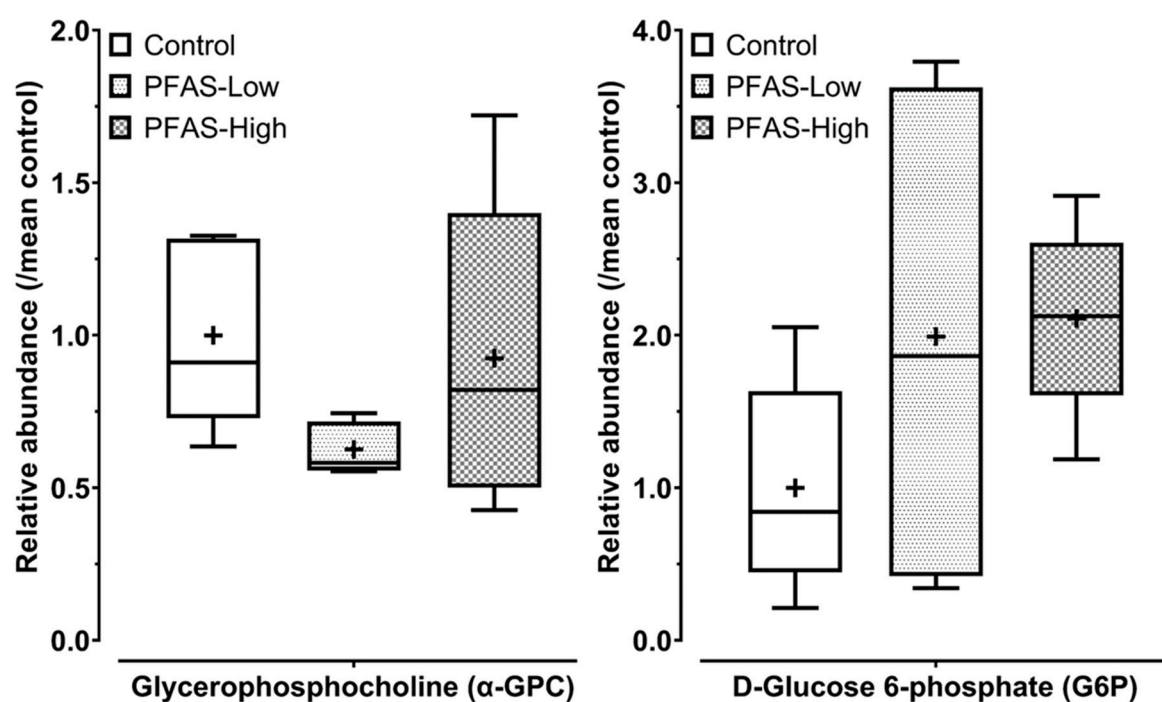

**Figure S5.** Box-and-whisker plot of glycerophosphocholine ( $\alpha$ -GPC) and D-glucose 6-phosphate, which contributed to the enrichment analysis shown in Fig. 4B. The y-axis represents the relative concentration corrected by dividing it by the mean of the control group. + indicates mean values. No significant differences were detected in all substances (false discovery rate adjusted  $p > 0.05$ ).



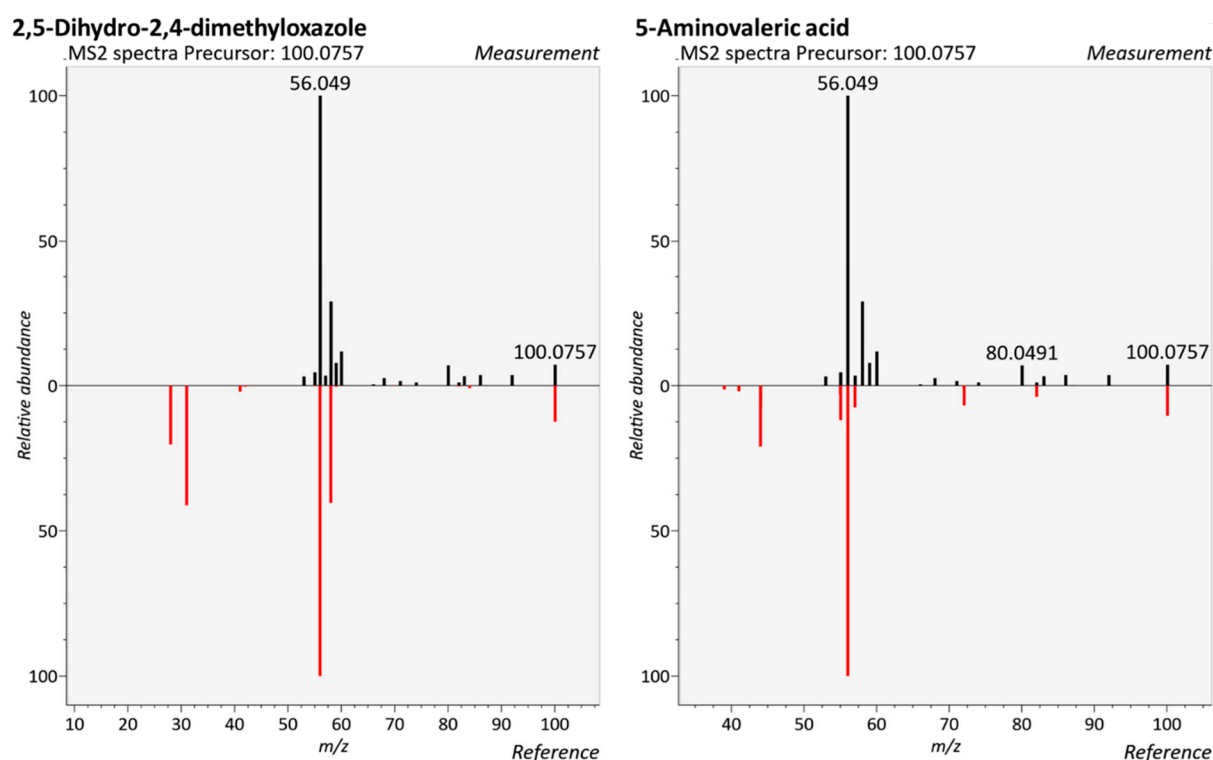

**Figure S6.** MSMS spectra of representative metabolite. The upper black peaks are the measured value, and the lower red ones are the reference. 2,5-Dihydro-2,4-dimethyloxazole had the highest annotation score based on MSMS similarity (score = 87.25), but was rejected because it is a plant-derived compound. 5-Aminovaleric acid had the second highest annotation score (score = 80.06), is an endogenous metabolite, and was selected as an annotation for this MSMS spectrum.

**Table S1. Primer information.** All primers were designed using the National Center for Biotechnology Information Primer designing tools. Amplification efficiency was determined by six points of 5-fold step dilution (number of replicates = 4).

| Gene<br>(Product size)    | Sequences                                                          | Amplification efficiency<br>(%)<br>Standard error of mean |
|---------------------------|--------------------------------------------------------------------|-----------------------------------------------------------|
| <i>Chrna4</i><br>(177 bp) | Forward : GTGTGGGTGAAGCAGGAGTG<br>Reverse : GGTGGGTGACTGCAAAGTCC   | 103.4<br>3.2                                              |
| <i>Ccnd1</i><br>(152 bp)  | Forward : CATTTCCAACCCACCTCCA<br>Reverse : CCAGGGCCTTGACCGGG       | 97.9<br>4.5                                               |
| <i>Pcsk9</i><br>(174 bp)  | Forward : ATCACCGACTTCAACAGCGT<br>Reverse : GCCCTTCCCTTGACAGTTGA   | 90.2<br>2.3                                               |
| <i>Fasn</i><br>(111 bp)   | Forward : CCTTCGGTTCAGTCTCTTTCCA<br>Reverse : ACACCTCCAAGGAGTCTCAC | 90.6<br>1.7                                               |
| <i>Cdc6</i><br>(103 bp)   | Forward : TTACGGTGGTGATCGAGACG<br>Reverse : TGATGGCCACACAACTCTCTG  | 96.9<br>4.3                                               |
| <i>Myc</i><br>(94 bp)     | Forward : GTTGGAACCCCGCAGACAG<br>Reverse : ATAGGGCTGTACGGAGTCGT    | 99.1<br>3.5                                               |
| <i>Actb</i><br>(86 bp)    | Forward : ACTGTGAGTCGCGTCCA<br>Reverse : ATCCATGGCGAACTGGTGG       | 97.9<br>0.6                                               |

**Table S2.** Top 10 genes upregulated after PFAS exposure detected by RNA-sequence.

| Transcript ID | Gene Symbol | Gene biotype   | Protein ID     | PFAS-Low/Control |               | PFAS-High/Control |               |
|---------------|-------------|----------------|----------------|------------------|---------------|-------------------|---------------|
|               |             |                |                | Fold change      | Log10 p value | Fold change       | Log10 p value |
| XR_001778663  | Gm32006     | lncRNA         | .              | 11.69            | -27.12        | 8.46              | -20.00        |
| XR_001778560  | Gm35254     | lncRNA         | .              | 9.73             | -19.24        | 5.86              | -10.56        |
| XR_871801     | Gm32872     | lncRNA         | .              | 9.62             | -4.06         | 7.82              | -3.65         |
| XR_379628     | Gm33459     | lncRNA         | .              | 9.41             | -32.79        | 6.39              | -22.85        |
| NM_130448     | Pcdh18      | protein_coding | NP_569715.3    | 8.35             | -6.07         | 4.80              | -2.74         |
| NM_001001180  | Zfp941      | protein_coding | NP_001001180.2 | 8.10             | -5.17         | 4.00              | -1.63         |
| XR_003948291  | Gm39299     | lncRNA         | .              | 7.42             | -1.95         | 5.34              | -1.39         |
| XR_385146     | Gm34854     | lncRNA         | .              | 6.96             | -2.37         | 78.44             | -41.41        |
| XR_877087     | Gm30284     | lncRNA         | .              | 6.41             | -7.65         | 9.73              | -14.75        |
| NM_001361910  | Serpina9    | protein_coding | NP_001348839.1 | 6.12             | -3.24         | 5.11              | -2.64         |

Top 10 genes out of 185 genes with a >2-fold increase in expression in PFAS-Low and PFAS-High in common compared to the control, with a corrected *p*-value less than 0.05.



**Table S3.** Top 10 genes downregulated after PFAS exposure detected by RNA-sequence.

| Transcript_ID | Gene_Symbol  | Gene_biotype                     | Protein_ID     | PFAS-Low/Control |               | PFAS-High/Control |               |
|---------------|--------------|----------------------------------|----------------|------------------|---------------|-------------------|---------------|
|               |              |                                  |                | Fold change      | Log10 p value | Fold change       | Log10 p value |
| NR_004843     | Gm44502      | lncRNA<br>transcribed_pseudogene | .              | -37.30           | -26.29        | -42.09            | -29.05        |
| NR_033450     | Serpina3h    |                                  | .              | -15.08           | -24.60        | -93.32            | -38.95        |
| XR_003951569  | Gm41349      | lncRNA                           | .              | -8.41            | -4.06         | -4.29             | -2.53         |
| NM_033576     | Pcdhgb4      | protein_coding                   | NP_291054.1    | -7.31            | -3.20         | -6.63             | -3.19         |
| XR_003955335  | Gm42270      | lncRNA                           | .              | -7.00            | -3.98         | -3.43             | -2.47         |
| NM_023612     | Esm1         | protein_coding                   | NP_076101.1    | -6.69            | -5.48         | -4.56             | -4.62         |
| NM_001162950  | Hif3a        | protein_coding                   | NP_001156422.1 | -6.65            | -2.70         | -4.34             | -2.03         |
| NM_001142959  | Bcl2l15      | protein_coding                   | NP_001136431.1 | -6.43            | -2.53         | -3.28             | -1.40         |
| XR_003955939  | LOC115486295 | lncRNA                           | .              | -5.99            | -2.20         | -8.91             | -3.09         |
| NM_026840     | Pdgfrl       | protein_coding                   | NP_081116.3    | -5.85            | -4.84         | -13.04            | -8.84         |

Top 10 genes out of 82 genes with a >2-fold decrease in expression in PFAS-Low and PFAS-High in common compared to the control, with a corrected *p*-value less than 0.05.

**Table S4.** Docking scores.

| Compound | C length | Docking score (kcal/mol) |               |               |
|----------|----------|--------------------------|---------------|---------------|
|          |          | PPAR $\alpha$            | PPAR $\gamma$ | PPAR $\delta$ |
| PFOS     | C8       | 8.9                      | 8.7           | 8.7           |
| PFNA     | C9       | 8.2                      | 8.4           | 8.5           |
| PFOA     | C8       | 8.1                      | 8.1           | 8             |
| PFHpA    | C7       | 7.9                      | 7.5           | 7.6           |
| PFHxS    | C6       | 7.8                      | 7.9           | 7.2           |
| PFHxA    | C6       | 7.5                      | 6.9           | 7.1           |
| PFBS     | C4       | 6.7                      | 6.6           | 6.9           |
| PFPeA    | C5       | 6.5                      | 6.6           | 6.6           |
| PFBA     | C4       | 5.8                      | 5.9           | 5.9           |
| Agonists | -        | 7.4                      | 7.3           | 8.7           |

Theoretical docking scores were calculated by molecular docking. The representative docking poses are shown in Figure 5 and S3. Typical agonists of each peroxisome proliferator-activated receptor (PPAR) were docked into the PPARs for comparison. Agonists for PPAR $\alpha$ ; fenofibrate, PPAR $\gamma$ ; prostaglandin J2, PPAR $\delta$ ; seladelpar.
